- A-1327** Room G, 10/17/2000 2:00 PM - 4:00 PM (PS)  
**Intravenous Anesthetics Inhibit Capacitative Calcium Entry in Pulmonary Artery Smooth Muscle Cells** *Izumi Kondo, MD; Satoru Tanaka, MD; Derek Damron, PhD; Paul Murray, PhD, Anesthesiology Research, Cleveland Clinic Foundation, Cleveland, OH, United States.* Ketamine and diazepam inhibit capacitative calcium entry in pulmonary artery smooth muscle cells.
- A-1328** Room G, 10/17/2000 2:00 PM - 4:00 PM (PS)  
**Synergistic Effects of Hypoxia and Monocrotaline in Murine Pulmonary Hypertension** *Geoffrey K. Lightball, MD, PhD; Ronald G. Pearl, MD, PhD, Anesthesiology, Stanford University, Stanford, CA, United States.* The combination of monocrotaline and hypoxia led to RV hypertrophy and altered vascular morphology consistent with pulmonary hypertension—a greater effect than with hypoxia or monocrotaline alone.
- A-1329** Room G, 10/17/2000 2:00 PM - 4:00 PM (PS)  
**Does Sleep Apnea Hypopnea Syndrome Increase the Risks of Difficult Intubation and Extubation?** *Manjula, M.D.; M. Ramez Salem, M.D.; Natarajan V. Raman, M.D.; Ninos J. Joseph, B.S.; Arthur J. Klouden, M.D., Dept Anesth, Illinois Masonic Med Ctr, Cbgo, IL, United States.* Severe SAHS is likely associated with difficult airway management. Adequate help and equipment should be available during intubation and extubation.
- A-1330** Room G, 10/17/2000 2:00 PM - 4:00 PM (PS)  
**The Effects of Intravenous Almitrine on PaO<sub>2</sub> during One-Lung Ventilation (OLV)** *Marc Moutafis, MD; Nicolas Dalibon, MD; Ngai Liu, MD; Guy Kublman, MD; Marc Fischler, MD, Anesthesiology, Hopital Foch, Suresnes, France.* Intravenous almitrine partially prevents the increase in pulmonary shunt and the decrease in PaO<sub>2</sub> induced by one-lung ventilation.
- A-1331** Room G, 10/17/2000 2:00 PM - 4:00 PM (PS)  
**Ketamine and Etomidate Inhibit Acetylcholine-Induced Pulmonary Vasorelaxation** *Koji Ogawa, MD; Satoru Tanaka, MD; Paul Murray, PhD, Anesthesiology Research, Cleveland Clinic Foundation, Cleveland, OH, United States.* Ketamine and etomidate inhibit acetylcholine induced pulmonary vasorelaxation by attenuating both the NO- and EDHF-mediated components of the response.
- A-1332** Room G, 10/17/2000 2:00 PM - 4:00 PM (PS)  
**Meta-Analysis of the Effect of Low Dose Volatile Anesthetics on the Ventilatory Response to Hypoxia** *Jaideep J. Pandit, FRCA, Nuffield Department of Anaesthetics, John Radcliffe Hospital, Oxford, United Kingdom.* The meta-analysis suggests that studies differ because anesthetics have different actions on the hypoxic chemoreflex; not because of the different study conditions used.
- A-1333** Room G, 10/17/2000 2:00 PM - 4:00 PM (PS)  
**The Protective Role of TIMP-1 in a Acid Aspiration Mouse Model** *Edward T. Plata, DC, MD; Jadwiga D. Helinski, MA; Bruce A. Davidson, BS; Paul Soloway, PhD; Paul R. Knight, MD, PhD, Anesthesiology, SUNY Buffalo, Buffalo, NY, United States.* We disproved our original hypothesis and found that TIMP-1 KO mice are not more vulnerable to lung injury following acid aspiration.
- A-1334** Room G, 10/17/2000 2:00 PM - 4:00 PM (PS)  
**Piglet Diaphragm Function during Prolonged Mechanical Ventilation** *Peter J. Radell, MD; Sten Remabl, MD, PhD; David G. Nichols, MD; Lars I. Eriksson, MD, PhD, Dept. of Anesthesia and Intensive Care, Karolinska Hospital and Institute, Stockholm, Sweden.* Piglet diaphragm contractility and evoked EMG amplitude decreased after 5 days controlled mechanical ventilation.
- A-1335** Room G, 10/17/2000 2:00 PM - 4:00 PM (PS)  
**Isoflurane Potentiates  $\beta$  Adrenoreceptor Mediated Pulmonary Vasorelaxation** *Ju-Tae Sohn, MD; Paul Murray, PhD, Anesthesiology Research, Cleveland Clinic Foundation, Cleveland, OH, United States.* Isoflurane potentiates  $\beta$  adrenoreceptor-mediated pulmonary vasorelaxation via an endothelium-dependent mechanism at a site upstream of adenylyl cyclase in the signaling pathway.
- A-1336** Room G, 10/17/2000 2:00 PM - 4:00 PM (PS)  
**Effects of Hypoxia on EDHF-Mediated and Anandamide-Induced Relaxation in Canine Pulmonary Artery** *Satoru Tanaka, MD; Koji Ogawa, MD; Paul Murray, PhD, Anesthesiology Research, Cleveland Clinic Foundation, Cleveland, OH, United States.* Hypoxia inhibits EDHF-mediated, but not anandamide-induced, relaxation in canine pulmonary artery.
- A-1337** Room G, 10/17/2000 2:00 PM - 4:00 PM (PS)  
**Probenecid Effect on Intracellular cGMP and Isometric Force in Canine Pulmonary Artery** *Miwa Taniguchi, M.D.; Keith A. Jones, M.D.; David O. Warner, M.D.; William J. Perkins, M.D., Anesthesiology, Mayo Clinic and Foundation, Rochester, MN, United States.* cGMP efflux does not play a significant role in regulating intracellular cGMP in canine pulmonary artery following treatment with nitric oxide.
- A-1338** Room G, 10/17/2000 2:00 PM - 4:00 PM (PS)  
**Respiratory Depression by Tramadol: Involvement of Opioid Receptors** *Luc J. Teppema, PhD; Cees N. Olivier; Albert Daban, MD PhD, Department of Physiology, Leiden University Medical Center, Leiden, Netherlands.* Tramadol causes considerable respiratory depression, which is, for at least 50%, due to an action on opioid receptors.
- A-1339** Room G, 10/17/2000 2:00 PM - 4:00 PM (PS)  
**Mapping of Regional Pulmonary PaO<sub>2</sub>, PaCO<sub>2</sub> and pH through Mathematical Modeling of Positron Emission Tomography (PET) Data** *M.F. Vidal Melo, MD, PhD; D.M. Call; R.S. Harris, MD; J.D.H. Layfield; J.G. Venegas, PhD, Anesthesia and Critical Care, Massachusetts General Hospital, Boston, MA, United States.* Mathematical modeling is applied to PET estimates of V<sub>A</sub> and Q providing images of local blood gases and pH.
- A-1340** Room G, 10/17/2000 2:00 PM - 4:00 PM (PS)  
**Effects of Posture and PEEP on Ventilation (V) and Perfusion (Q) Heterogeneity in Sheep** *Sten M. Walthers, MD PhD; Mats J. Jobansson, MD; Torun Flateboe; Anne Nicolaysen; Gunnar Nicolaysen, MD PhD, Heart Centre, University Hospital, Linköping, Sweden.* V/Q is more uniform in the prone posture. PEEP (10cmH<sub>2</sub>O) reduces V/Q heterogeneity in supine in spite of increased Q heterogeneity.
